# Supplementary material for: Tailoring of TiAl6V4 Surface Nanostructure for Enhanced In Vitro Osteoblast Response via Gas/Solid (Non-Line-of-Sight) Oxidation/Reduction Reactions
Source: MDPI journal article supplement (doi:10.3390/biomimetics7030117), 2022-08-25
Supplement: s1 [file s1]

# Supplemental Information

## Tailoring of TiAl6V4 Surface Nanostructure for Enhanced *in-vitro* Osteoblast Response via Gas/Solid (Non-Line-of-Sight) Oxidation/Reduction Reactions

Naotaka Ogura<sup>1,#</sup>, Michael B. Berger<sup>2,#</sup>, Pavan Srivas<sup>1</sup>, Sunghwan Hwang<sup>1</sup>, Jiaqi Li<sup>1</sup>, D. Joshua Cohen<sup>2</sup>, Zvi Schwartz<sup>2,3,\*</sup>, Barbara D. Boyan<sup>2,4,\*</sup>, and Kenneth H. Sandhage<sup>1,\*</sup>

\*Barbara D. Boyan  
bboyan@vcu.edu  
ORCID = 0000-0002-9642-0311

\*Zvi Schwartz  
[zschwartz@vcu.edu](mailto:zschwartz@vcu.edu)  
ORCID = 0000-0003-1612-9223

\*Kenneth H. Sandhage  
[sandhage@purdue.edu](mailto:sandhage@purdue.edu)  
ORCID = 0000-0002-7957-1361

<sup>1</sup>School of Materials Engineering, Purdue University, W. Lafayette, IN 47907, USA

<sup>2</sup>Department of Biomedical Engineering, Virginia Commonwealth University, Richmond, VA 23284, USA

<sup>3</sup>Department of Periodontology, University of Texas Health Science Center at San Antonio, San Antonio, TX 78229, USA

<sup>4</sup>Wallace H. Coulter Department of Biomedical Engineering at the Georgia Institute of Technology and Emory University, Atlanta, GA 30332, USA

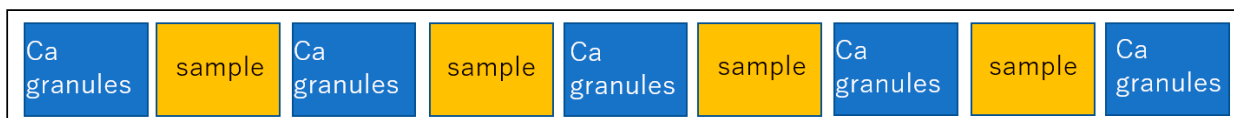

**Supplemental Figure S1.** Schematic illustration of the alternating arrangement of oxidized TiAl6V4 specimens (in Ti crucibles) with Ca granules (also in Ti crucibles), all of which were sealed within a steel ampoule, for the calciothermic reaction step.

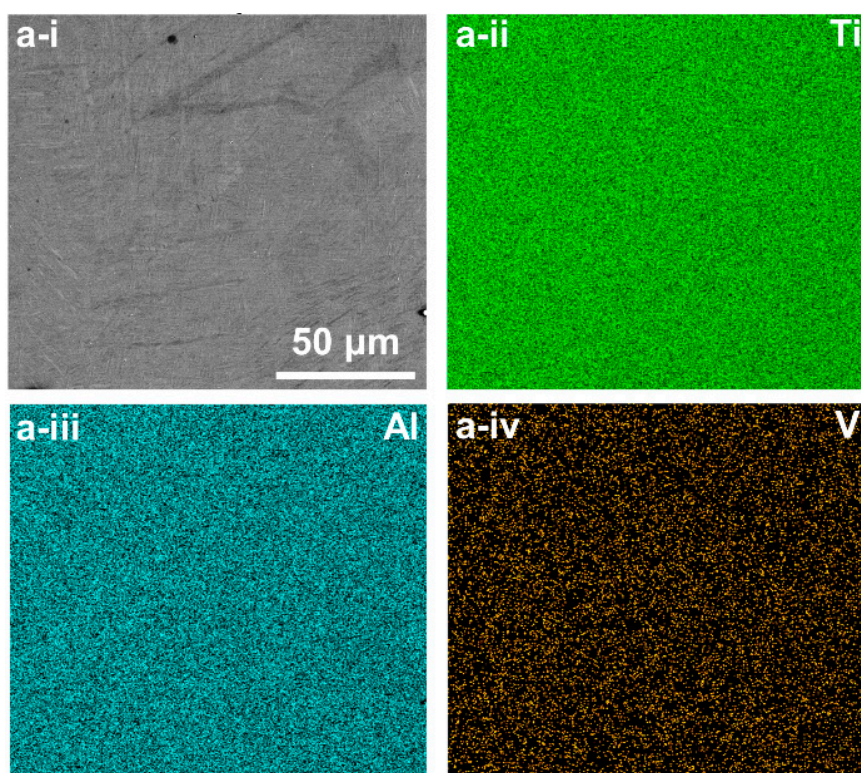

**Supplemental Figure S2.** Characterization of a starting polished DMLS TiAl6V4 specimen: (a-i) top-down BSE (backscattered electron) image of the surface and associated EDX elemental maps for (a-ii) titanium, (a-iii) aluminum, and (a-iv) vanadium.

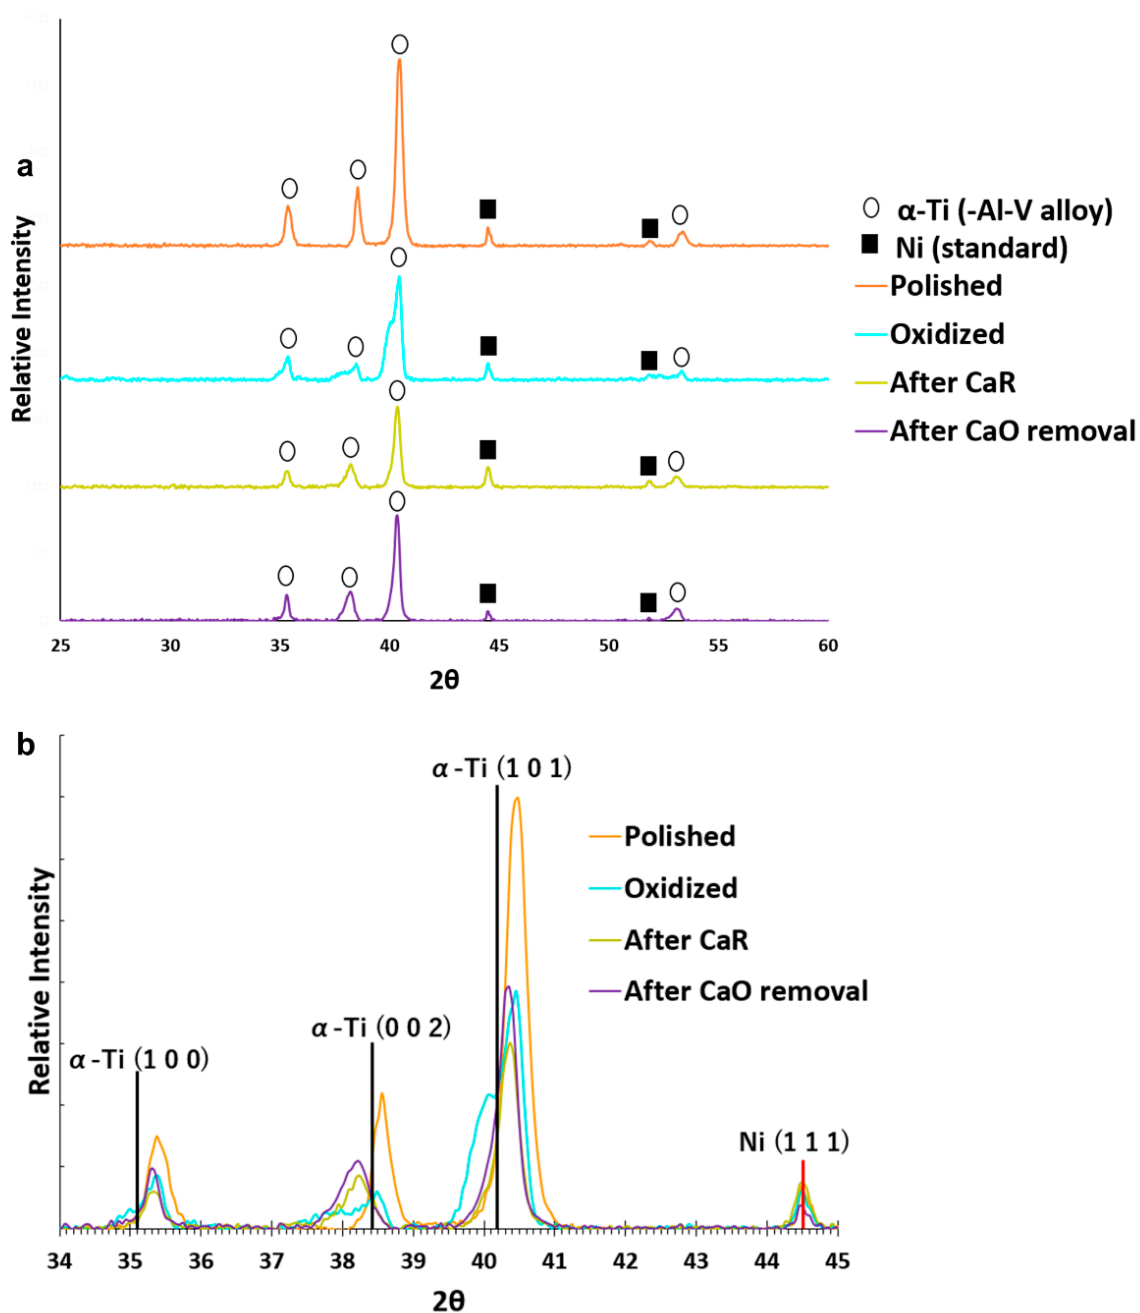

**Supplemental Figure S3.** XRD analyses of polished DMLS TiAl6V4 specimen surfaces after each reaction stage: (a) separated XRD patterns ( $2\theta = 25$ -60 degrees); (b) superimposed XRD patterns ( $2\theta = 34$ -45 degrees), with vertical black lines indicating the positions of diffraction peaks for pure  $\alpha$ -titanium (note: “After CaR” indicates after the calciothermic reaction).



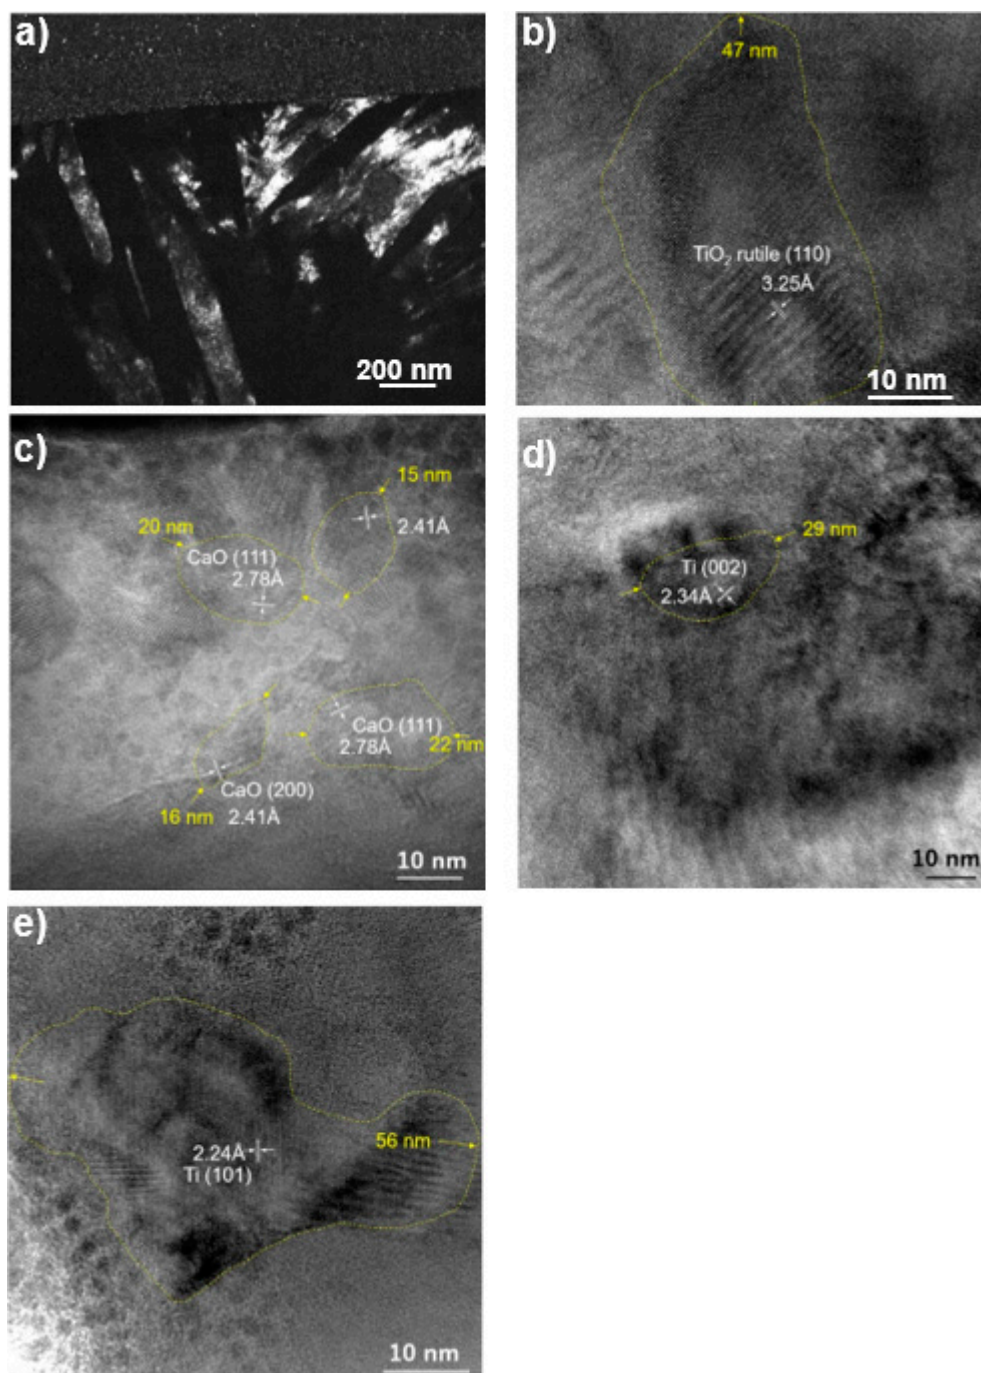

**Supplemental Figure S4.** TEM analyses at various stages of reaction of polished DMLS TiAl6V4 specimens: (a) Dark field TEM image of an ion-milled cross-section of the polished starting DMLS specimen revealing  $\alpha$ -TiAl6V4 crystals; (b) HRTEM image of the nanocrystalline rutile TiO<sub>2</sub> layer generated upon oxidation at 600 °C for 6 h in air; (c) HRTEM image of the nanocrystalline CaO layer formed upon reaction of the oxidized TiAl6V4 specimen with Ca(g) at 700 °C for 1 h; (d) HRTEM image of the nanocrystalline  $\alpha$ -Ti-rich layer formed upon reaction of the oxidized TiAl6V4 specimen with Ca(g) at 700 °C for 1 h; (e) HRTEM image of the nanocrystalline  $\alpha$ -Ti-rich layer after selective acetic acid dissolution of the CaO generated upon reaction of the oxidized TiAl6V4 specimen with Ca(g) at 700 °C for 1 h.

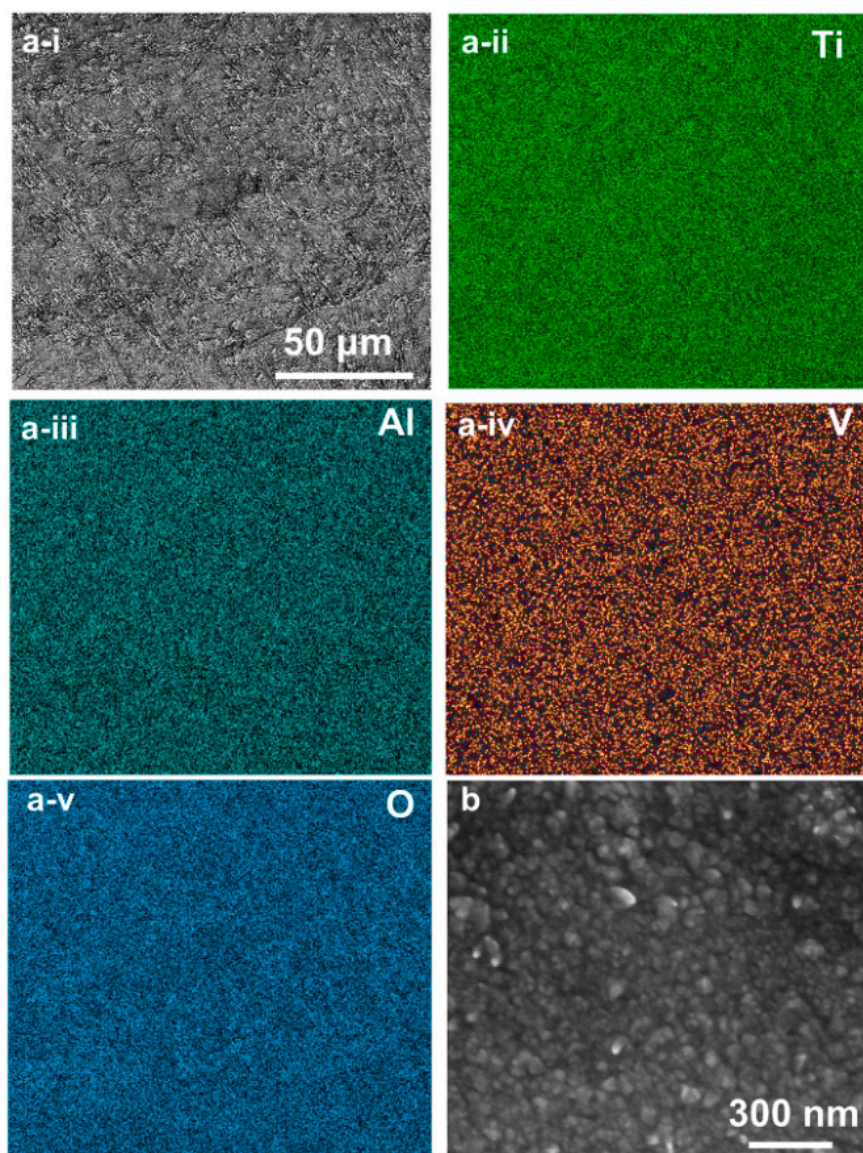

**Supplemental Figure S5.** Characterization of a polished DMLS TiAl6V4 specimen after exposure to air at 600°C for 6 h: **(a-i)** top-down BSE image of the surface and associated EDX elemental maps for **(a-ii)** titanium, **(a-iii)** aluminum, **(a-iv)** vanadium, and **(a-v)** oxygen; **(b)** higher-magnification top-down SE image of the surface



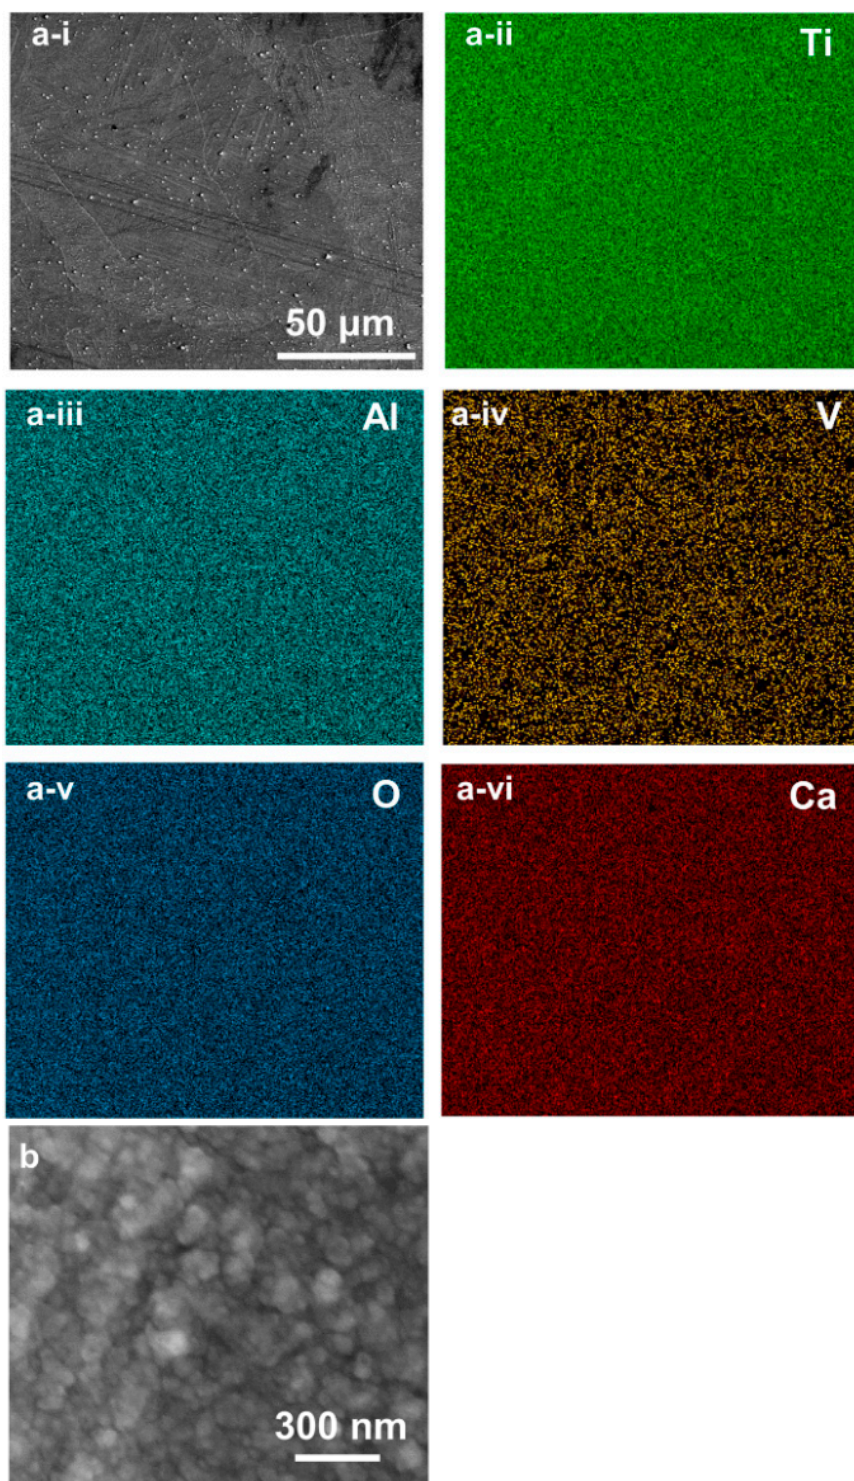

**Supplemental Figure S6.** Characterization of a polished, oxidized DMLS TiAl6V4 specimen after calciothermic reaction at 700°C for 1 h: (**a-i**) top-down BSE image of the surface and associated EDX elemental maps for; (**a-ii**) titanium; (**a-iii**) aluminum; (**a-iv**) vanadium; (**a-v**) oxygen; and (**a-vi**) calcium; (**b**) higher-magnification top-down SE image of the oxidized surface.

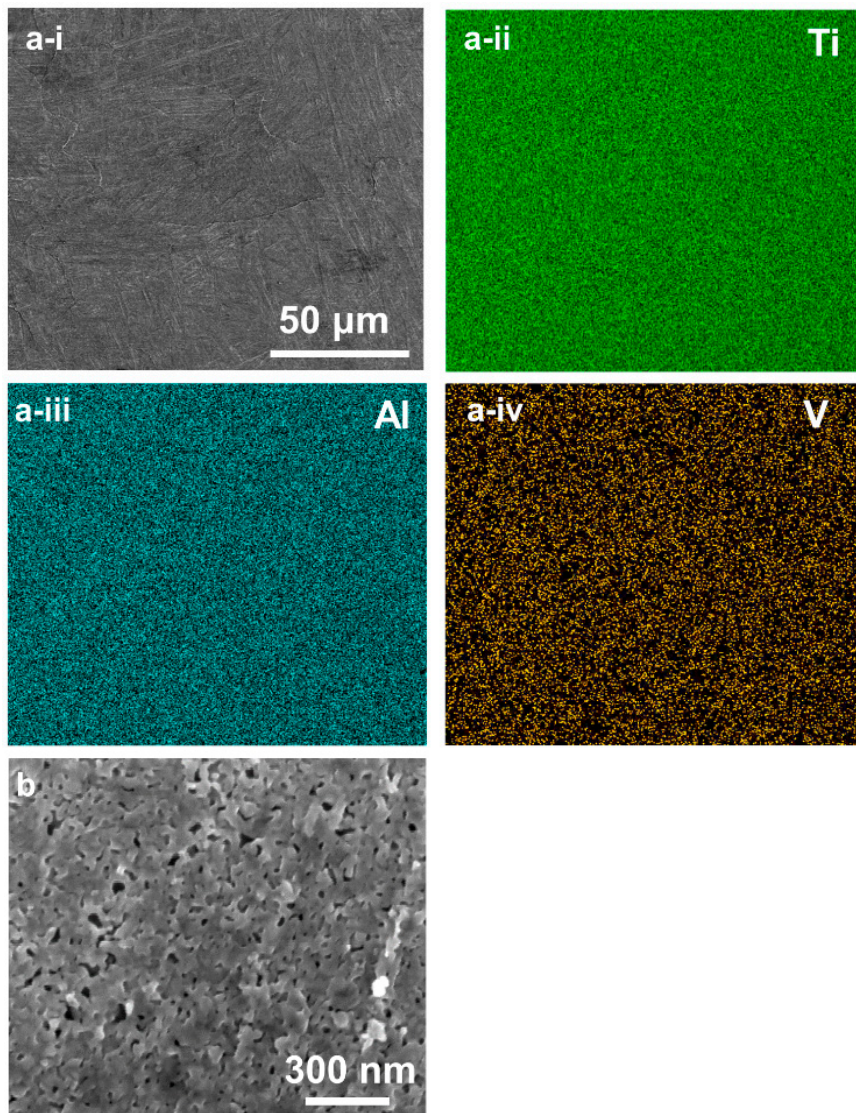

**Supplemental Figure S7.** Characterization of a polished, oxidized, and calciothermally-reacted DMLS TiAl6V4 specimen after selective CaO dissolution: **(a-i)** top-down SEM image of the surface and associated EDX elemental maps for **(a-ii)** titanium, **(a-iii)** aluminum, and **(a-iv)** vanadium; **(b)** Higher-magnification top-down SEM image of the surface.



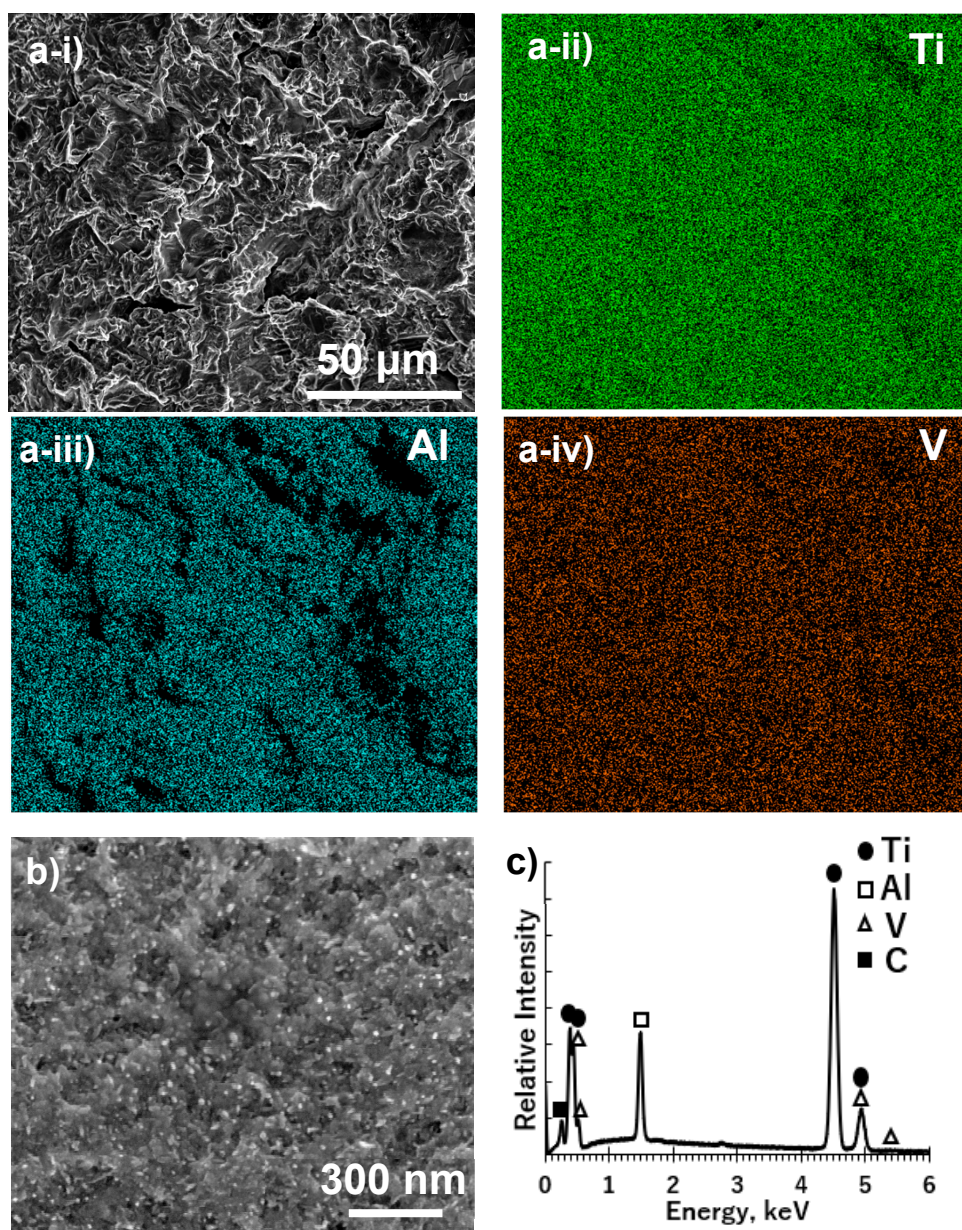

**Supplemental Figure S8.** Characterization of a starting microrough (grit-blasted and acid-etched) DMLS TiAl6V4 specimen: **(a-i)** SEM image of the external surface and associated EDX elemental maps for **(a-ii)** titanium, **(a-iii)** aluminum, and **(a-iv)** vanadium; **(b)** higher-magnification SEM image of the external surface; **(c)** SEM/EDX spectrum obtained from the external surface.



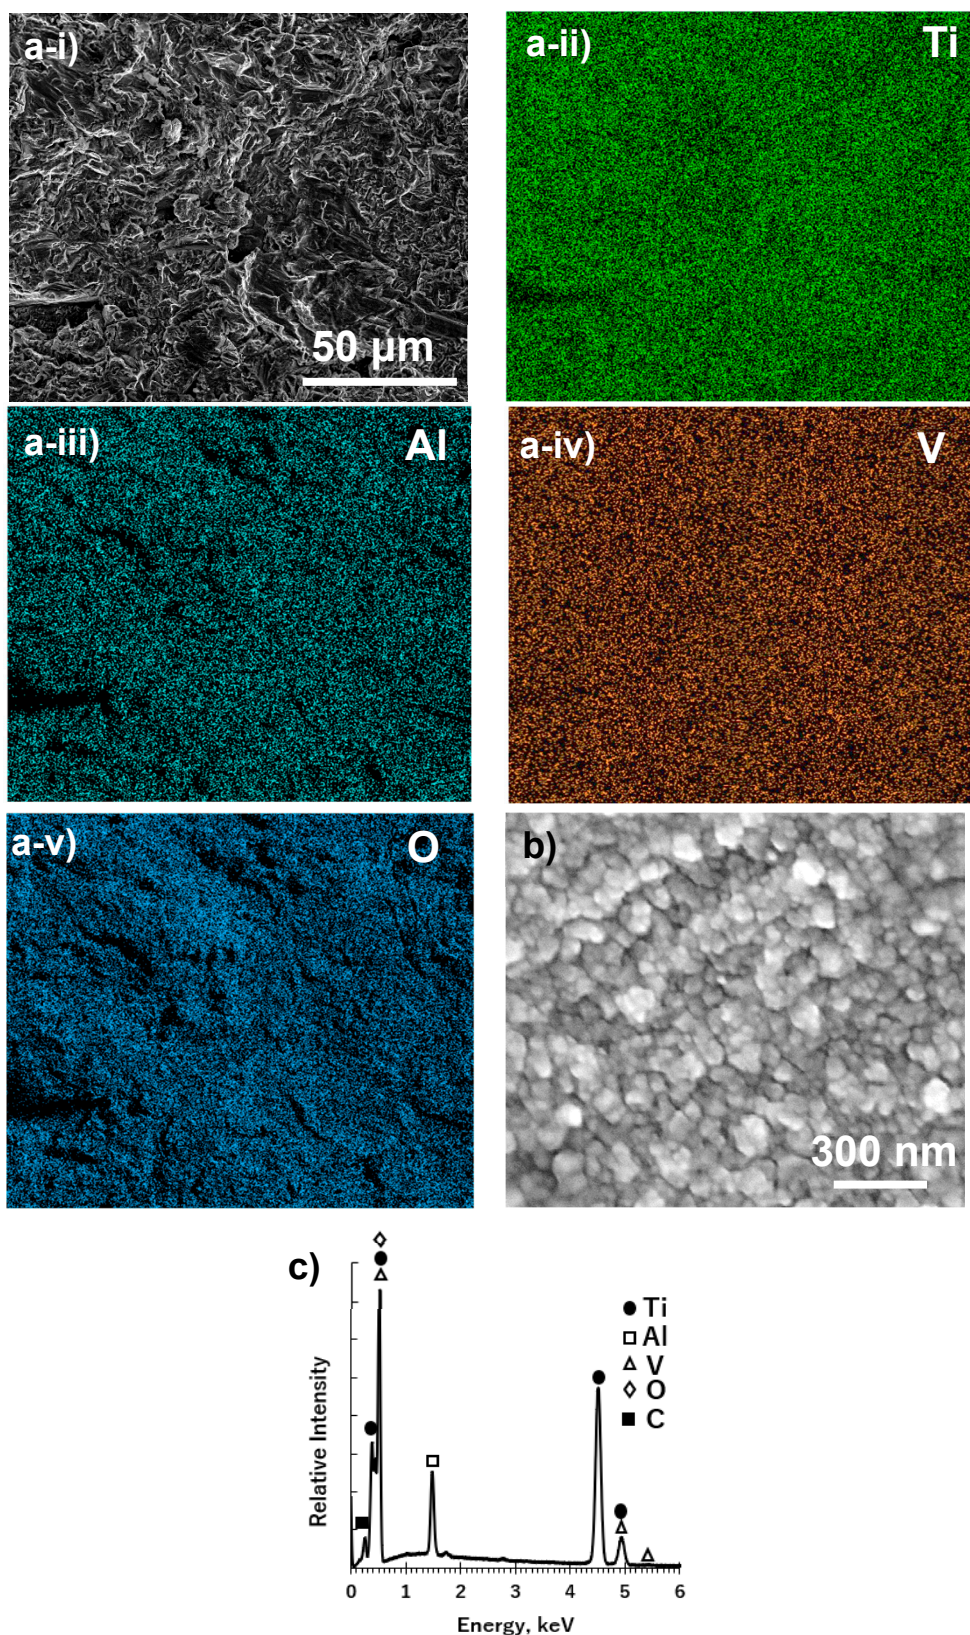

**Supplemental Figure S9.** Characterization of a microrough (grit-blasted and acid-etched) DMLS TiAl6V4 specimen after oxidation in air at 600°C for 6 h: (a-i) SEM image of the external surface and associated EDX elemental maps for (a-ii) titanium, (a-iii) aluminum, (a-iv) vanadium, and (a-v) oxygen; (b) higher-magnification SEM image of the external surface; (c) SEM/EDX spectrum obtained from the external surface.



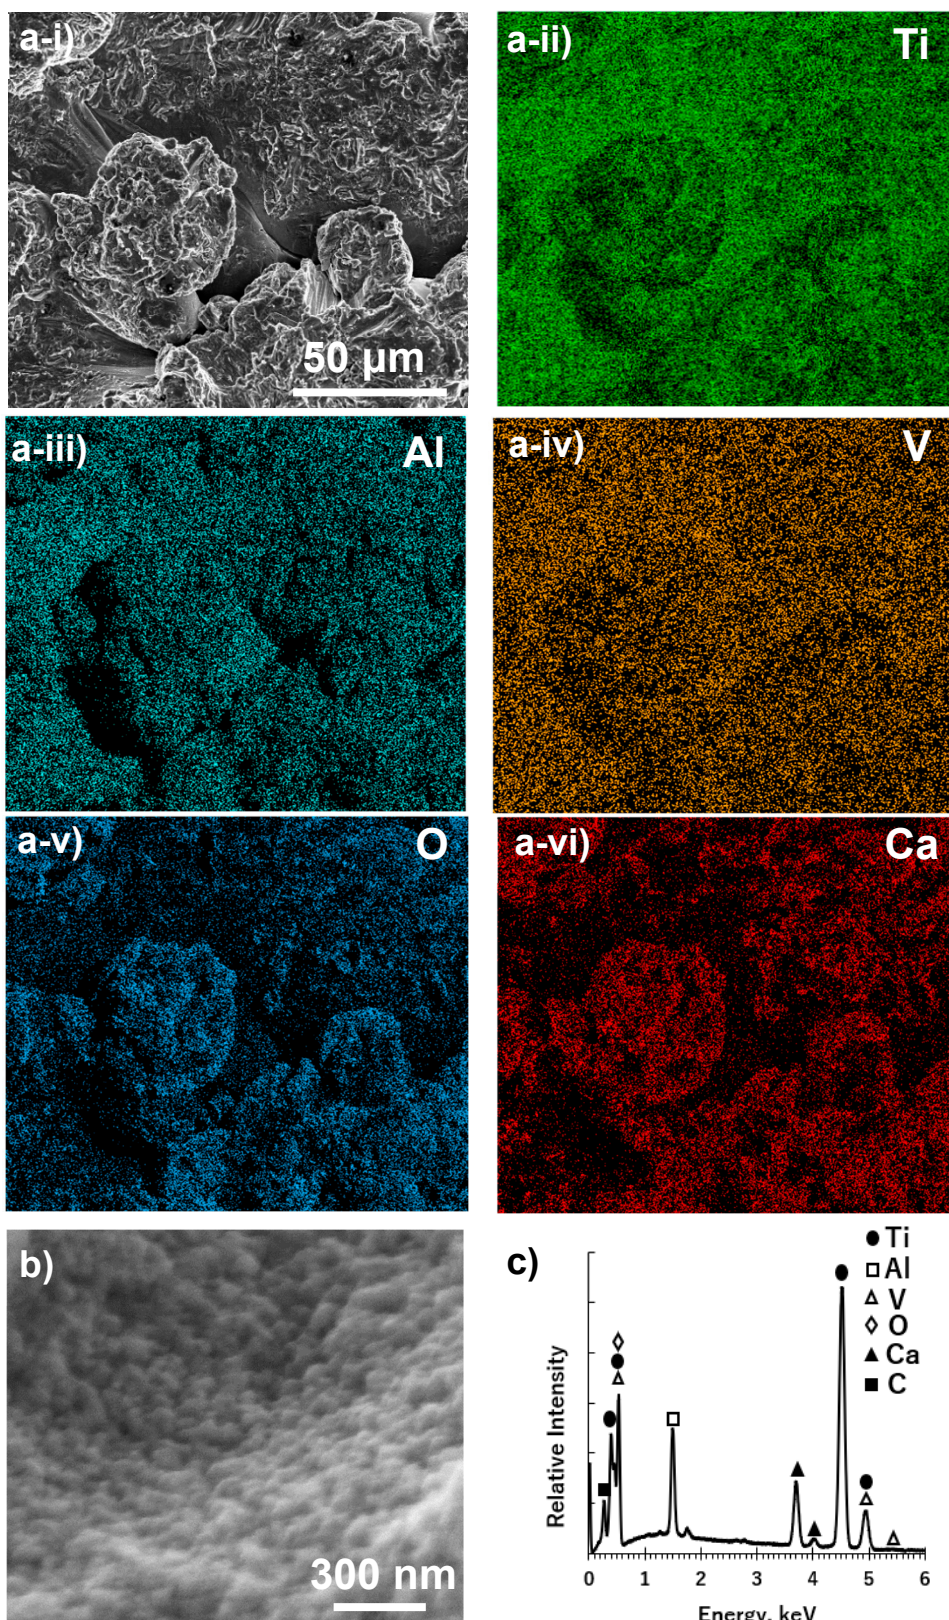

**Supplemental Figure S10.** Characterization of a microrough (grit-blasted and acid-etched), oxidized DMLS TiAl6V4 specimen after calcthermic reaction at 700 °C for 1 h: (a-i) SEM image of the external surface and associated EDX elemental maps for (a-ii) titanium, (a-iii) aluminum, (a-iv) vanadium, (a-v) oxygen, and (a-vi) calcium; (b) higher-magnification SEM image of the external surface; (c) SEM/EDX spectrum obtained from the external surface.



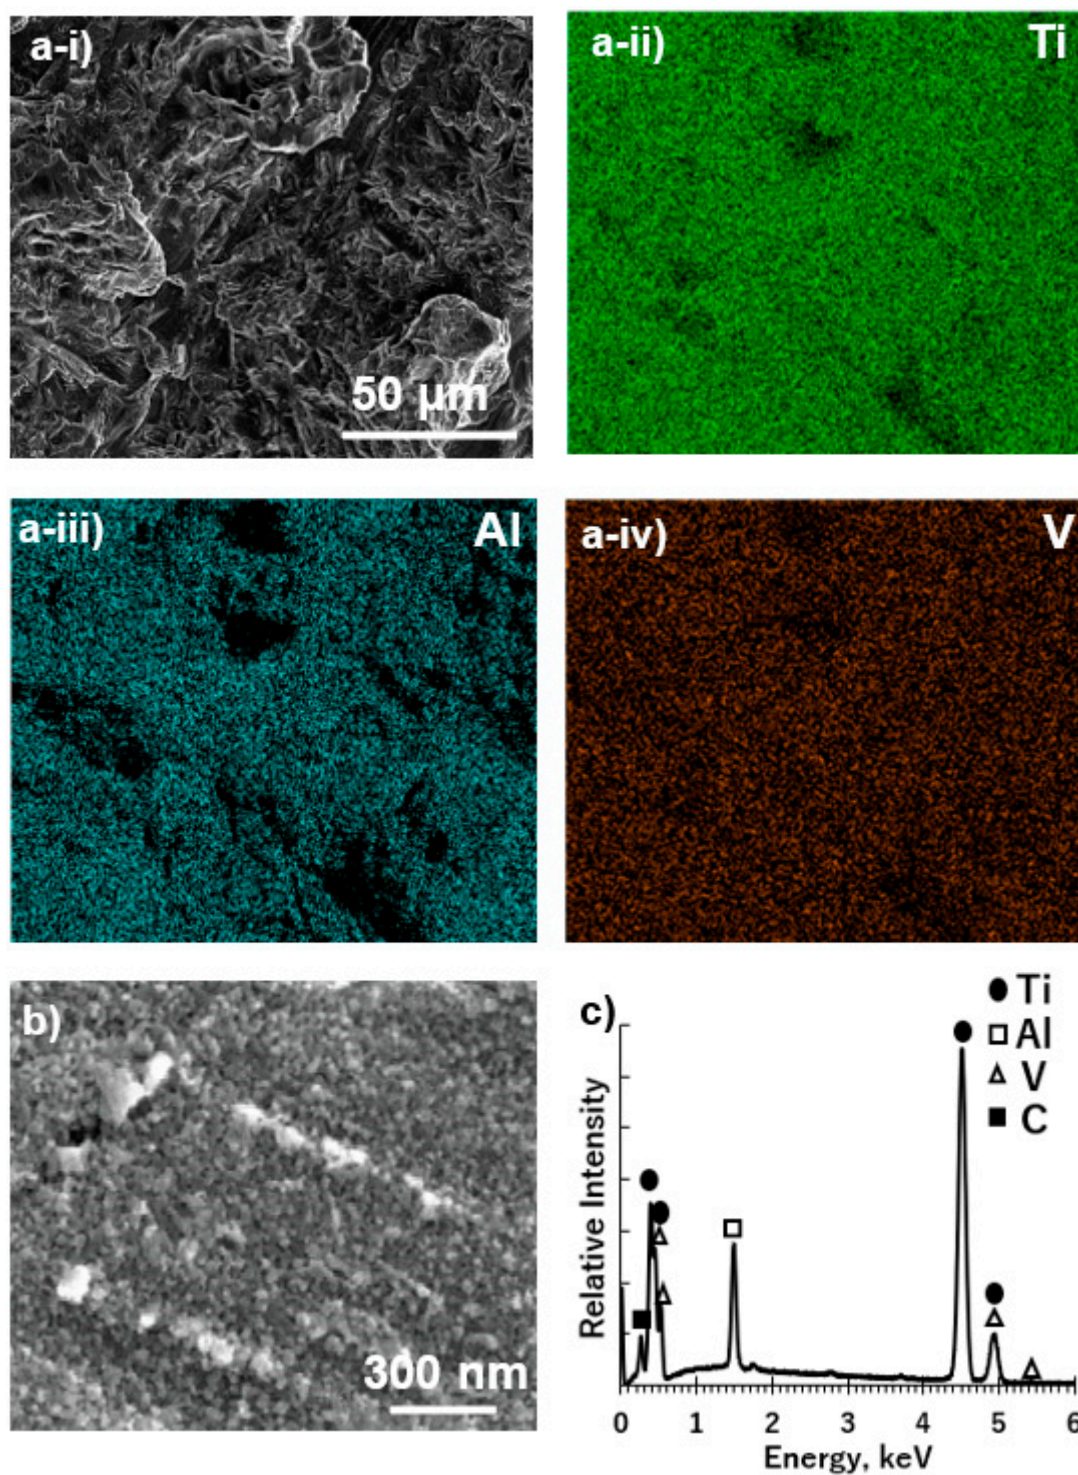

**Supplemental Figure S11.** Characterization of a microrough (grit-blasted and acid-etched), oxidized, calcthermally-reacted DMLS TiAl6V4 specimen after selective CaO dissolution: (a-i) SEM image of the external surface and associated EDX elemental maps for (a-ii) titanium, (a-iii) aluminum, and (a-iv) vanadium; (b) higher-magnification SEM image of the external surface; (c) SEM/EDX spectrum obtained from the external surface.



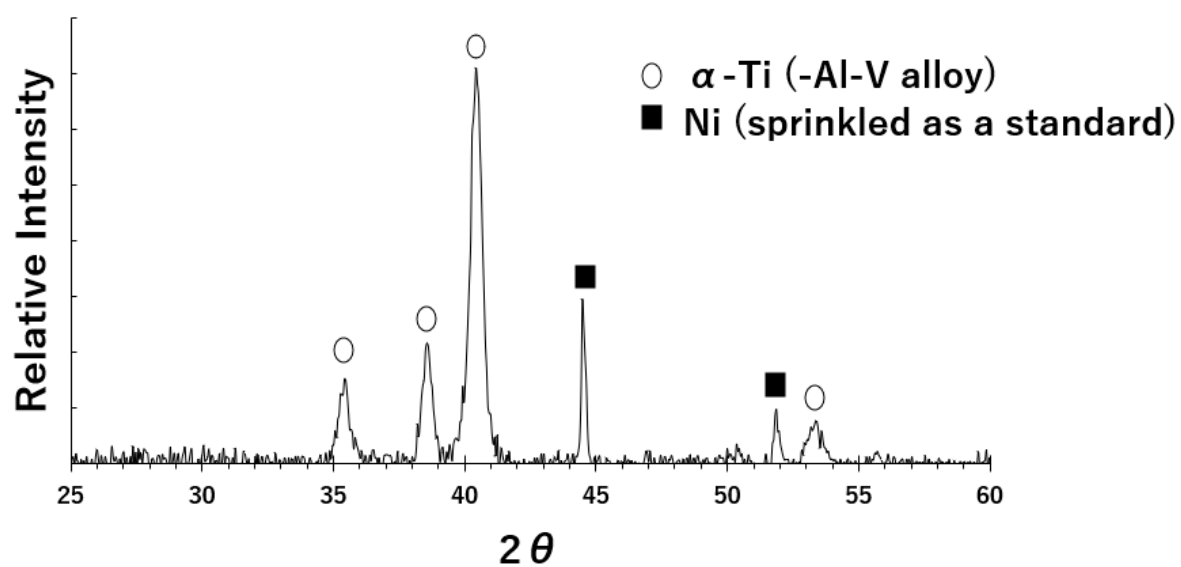

**Supplemental Figure S12.** XRD analyses of a starting microrough (grit-blasted, acid-etched) DMLS TiAl6V4 specimen.

**Supplemental Table S1.** Normalized compositions obtained from top-down SEM/EDX analyses of the surfaces of TiAl6V4 specimens at various stages of surface modification.

| <b>Specimen<br/>Condition</b>                    | <b>Ti<br/>(at%)</b> | <b>Al<br/>(at%)</b> | <b>V<br/>(at%)</b> | <b>O<br/>(at%)</b> | <b>Ca<br/>(at%)</b> | <b>Ti<br/>(wt%)</b> | <b>Al<br/>(wt%)</b> | <b>V<br/>(wt%)</b> | <b>O<br/>(wt%)</b> | <b>Ca<br/>(wt%)</b> |
|--------------------------------------------------|---------------------|---------------------|--------------------|--------------------|---------------------|---------------------|---------------------|--------------------|--------------------|---------------------|
| As polished<br>(Fig. 2b)                         | 86                  | 10                  | 4                  | ---                | ---                 | 90                  | 6                   | 4                  | ---                | ---                 |
| After oxidation<br>(Fig. 3c)                     | 38                  | 5                   | 2                  | 55                 | ---                 | 63                  | 4                   | 3                  | 30                 | ---                 |
| After<br>calciothermic<br>reduction<br>(Fig. 4c) | 43                  | 5                   | 2                  | 43                 | 7                   | 64                  | 4                   | 3                  | 21                 | 8                   |
| After CaO<br>dissolution<br>(Fig. 5c)            | 86                  | 10                  | 4                  | ---                | ---                 | 90.                 | 6                   | 4                  | ---                | ---                 |
